# Supplementary material for: Reliability of the Peer-Review Process for Adverse Event Rating
Source: PLoS One. 2012 Jul 26;7(7):e41239. doi: 10.1371/journal.pone.0041239 (PMC3406022; doi:10.1371/journal.pone.0041239)
Supplement: Appendix S1 — Example of posterior probability calculation. (DOCX) [file pone.0041239.s001.docx]

**Appendix S1**: Example of posterior probability calculation.

Suppose we want to calculate the posterior probability of an adverse event, given that 14 out of 30 reviewers assigned a positive rating:

We calculate this probability using a straightforward application of Bayes’ rule:

and the binomial formula:

From the latent class analysis, the prevalence of an adverse event is , common sensitivity is and

1-specificity==1-0.8264=0.1736.

Thus, using Bayes’ rule:

First calculate the numerator using the binomial formula:

Then calculate the denominator:

This yields the result:
